# Supplementary material
Source: PubMed Central journal article supplement (PMC7138155)
Supplement: mmc2.pdf [file mmc2.pdf]

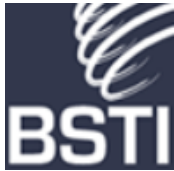

## COVID-19 BSTI Imaging Database

### **Why is there an imaging database?**

As the outbreak of COVID-19 in the UK evolves, a national understanding of the imaging features (particularly CT) is required to guide future management, national protocols, and to assist clinicians to more accurately identify and diagnose episodes of COVID-19 infection. All imaging uploaded will be reviewed by an expert panel of BSTI data-base members and will be considered for inclusion in this national reference and teaching database.

### **What imaging will the public be able to see and how will the database be used?**

After uploaded imaging is accepted, it will enter the database but be only viewable by the BSTI database panel. Selected cases with particular educational value and content will then be made available via the website, with annotated teaching points.

### **Where is the imaging stored and is it anonymised?**

All imaging should be anonymised by the referring trust, but it is then again anonymised automatically at upload via Cimar software ([www.cimar.co.uk](http://www.cimar.co.uk)) and stored at UK Cloud (<https://ukcloudhealth.com>). The imaging will only be stored for as long as the BSTI data-base panel deem it necessary.

### **How is the core referral database accessed secured?**

For BSTI data-base panel members, a pre-registered login with strong (forced renewable) password is required for any access. All access is audited, captured and all usage is logged.

### **How will the publicly viewable library of training images be accessed?**

The published teaching library and its content can be accessed without log on.

### **Do I need to do a Data Protection Impact Assessment (DPIA form)?**

This will be the decision of each individual trust, but an NHS Trust completed (NHSX endorsed) signed DPIA is available on the BSTI web-site and can be used as a template. Also available is Cimar's security and compliance document.

### **Do I need special software to view the imaging?**

Users can access and view the imaging online using Chrome, Safari, Firefox or Safari – on Apple and PC machines. A diagnostic viewer loads automatically for the user – no special software, downloads or installations are required to access and use the resource.
